# Supplementary material for: Conformational and thermodynamic properties modulate the nucleotide excision repair of 2-aminofluorene and 2-acetylaminofluorene dG adducts in the NarI sequence
Source: PubMed Central journal article supplement — Nucleic Acids Res. 2012 Jan 11;40(9):3939–51. doi: 10.1093/nar/gkr1307 (PMC3351159; doi:10.1093/nar/gkr1307), 2012-01-11
Supplement: supp_gkr1307_nar-02957-h-2011-File003.pdf [file supp_gkr1307_nar-02957-h-2011-File003.pdf]

## **Supplementary Material**

**Conformational and thermodynamic properties modulate the nucleotide excision repair of 2-aminofluorene and 2-acetylaminofluorene dG adducts in the *NarI* sequence**

Vipin Jain, Benjamin Hilton, Satyakam Patnaik, Yue Zou, M. Paul Chiarelli, and Bongsup P. Cho\*

mono-FAAF or FAF adducted 16-mer or 12 mer (underlined), respectively.

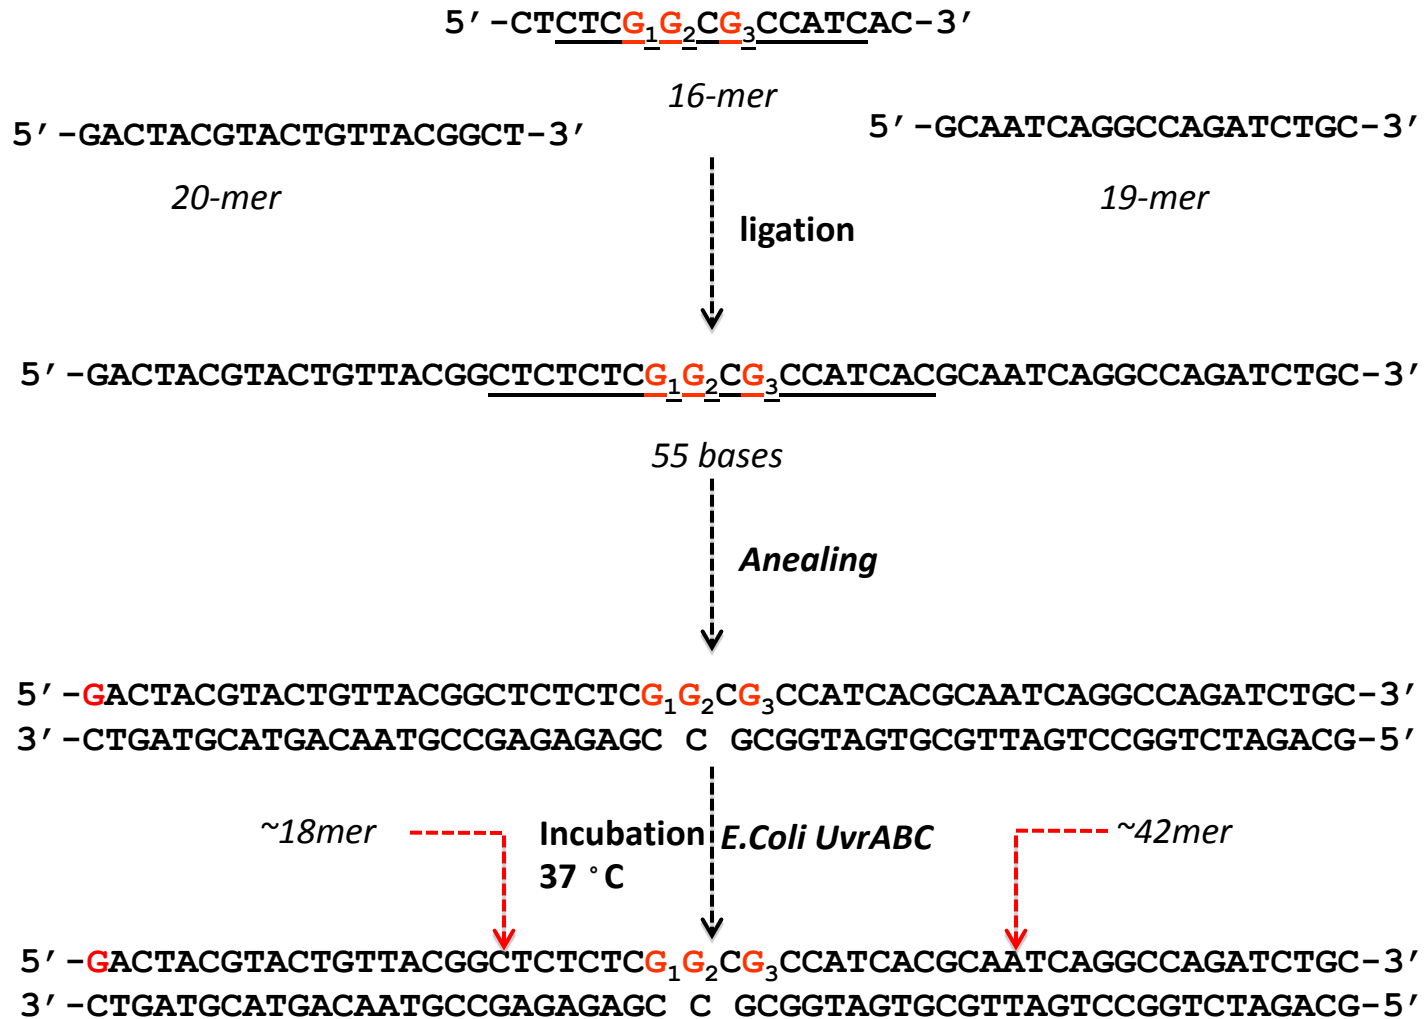

**Figure S1:** Schematic representation of strategy used for nucleotide excision repair by *E. coli* UvrABC for FAAF- and FAF-modified *NarI* duplexes.

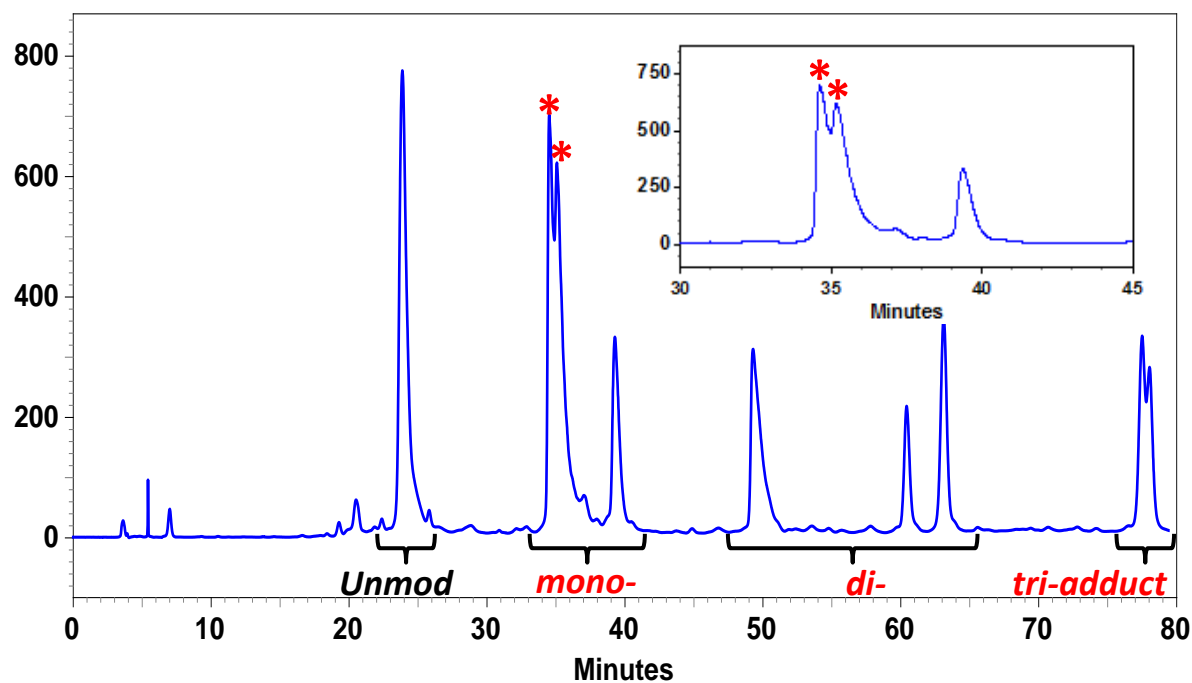

**Figure S2:** (a) HPLC chromatogram of a reaction mixture between 12-mer *NarI* sequence (5'-CTCG<sub>1</sub>G<sub>2</sub>CG<sub>3</sub>CCATC-3') and N-acetoxy-N-2-(acetylamino)-7-fluorofluorene. The mono-, di-, and tri-FAAF adducts were eluted in the 33-41, 47-65, and 76-78 min ranges. The asterisked peaks could not be resolved. The gradient condition was 3-15% acetonitrile in ammonium acetate buffer (pH 7.0, 100 mM) for 40 min, followed by 15-35% for 60 min, and back to 3% acetonitrile in 10 min, flow rate 2 mL/min.

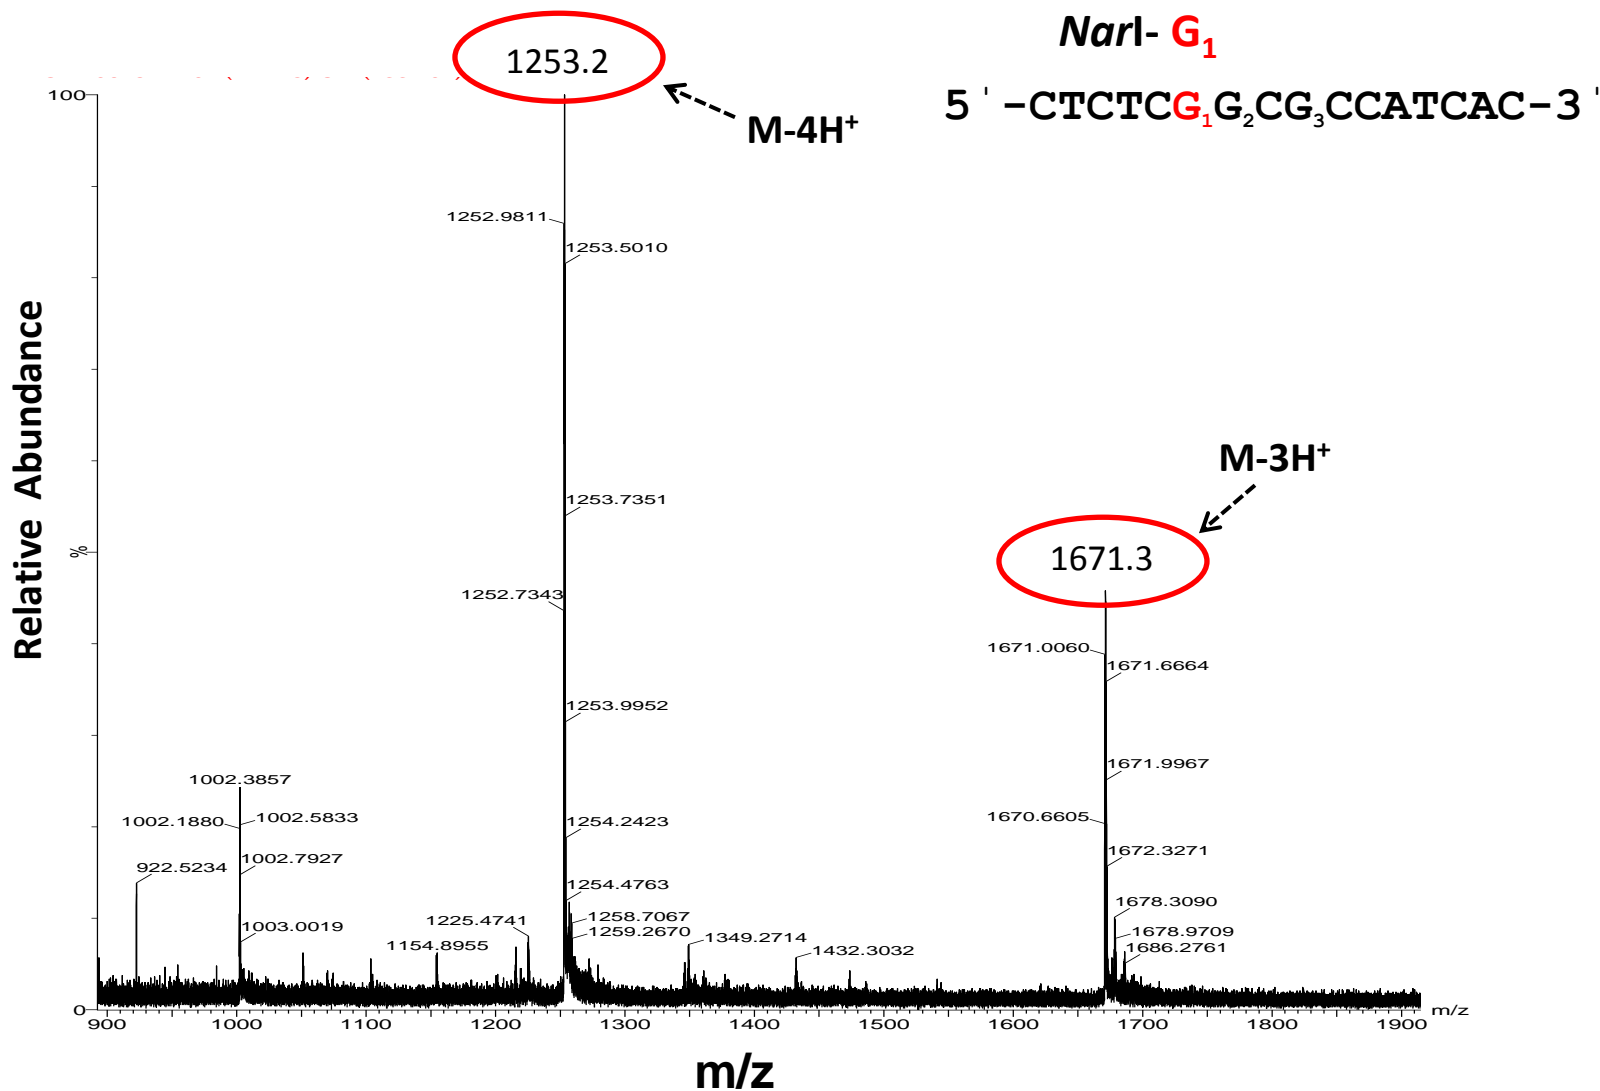

**Figure S3:** Molecular ion spectra of peak 1 obtained from FAAF-modification of *NarI* 16-mer template conducted on Waters SYNAPT ESI-QTOF-mass spectrometer in negative ion and V-modes.

# NarI G<sub>1</sub> 3' exonuclease digestion

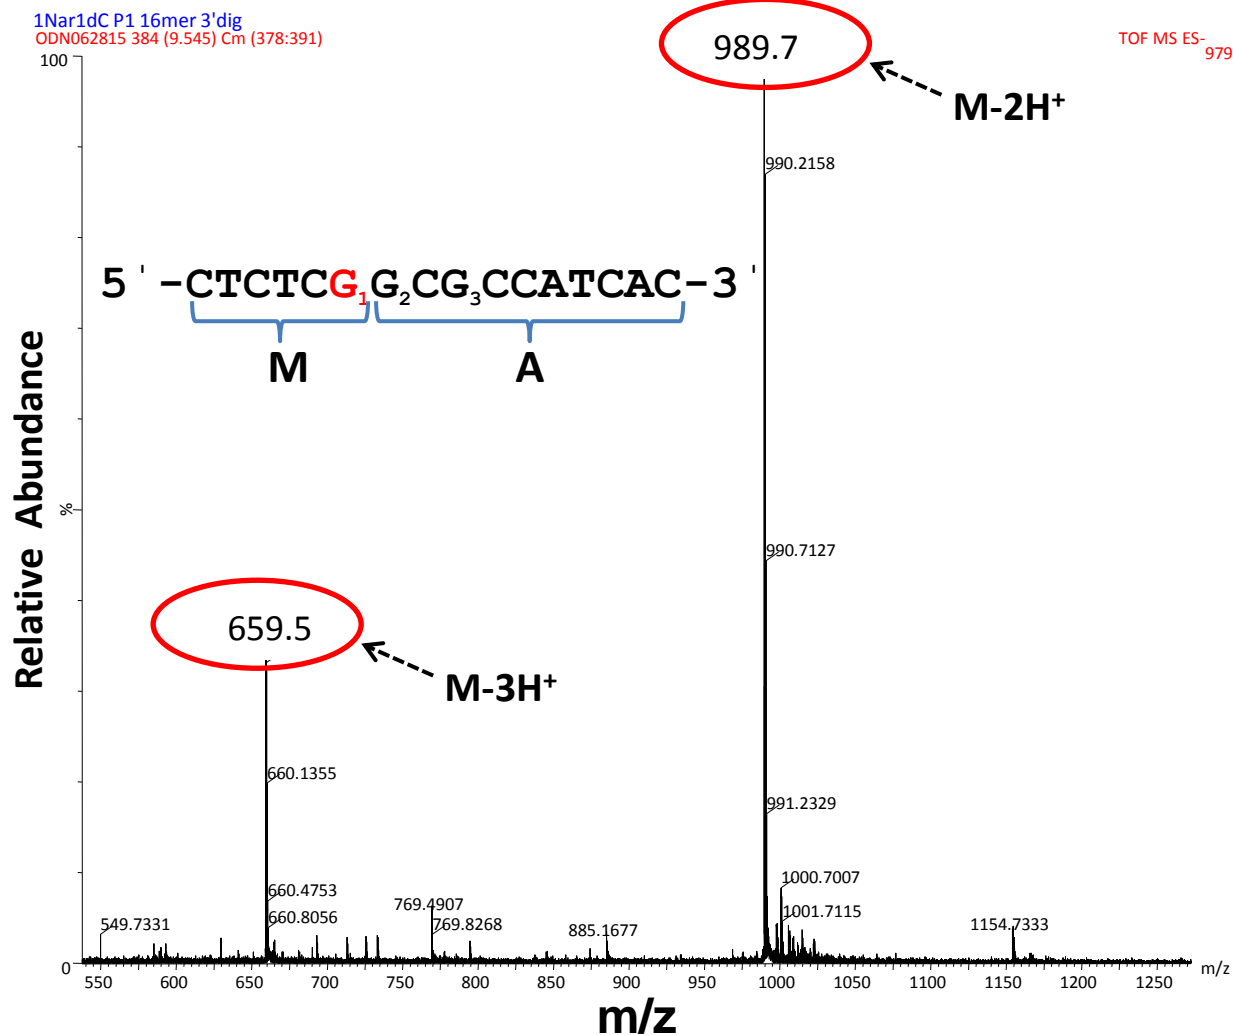

**Figure S4:** Molecular ion spectra of peak 1 after 3'-exonuclease digestion conducted on Waters SYNAPT ESI-QTOF-mass spectrometer in negative ion and V-modes.

# NarI G<sub>3</sub> 5' exonuclease digestion

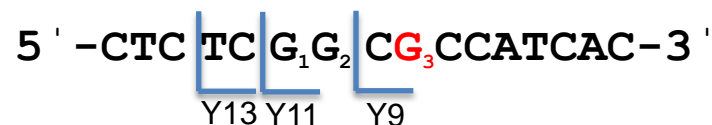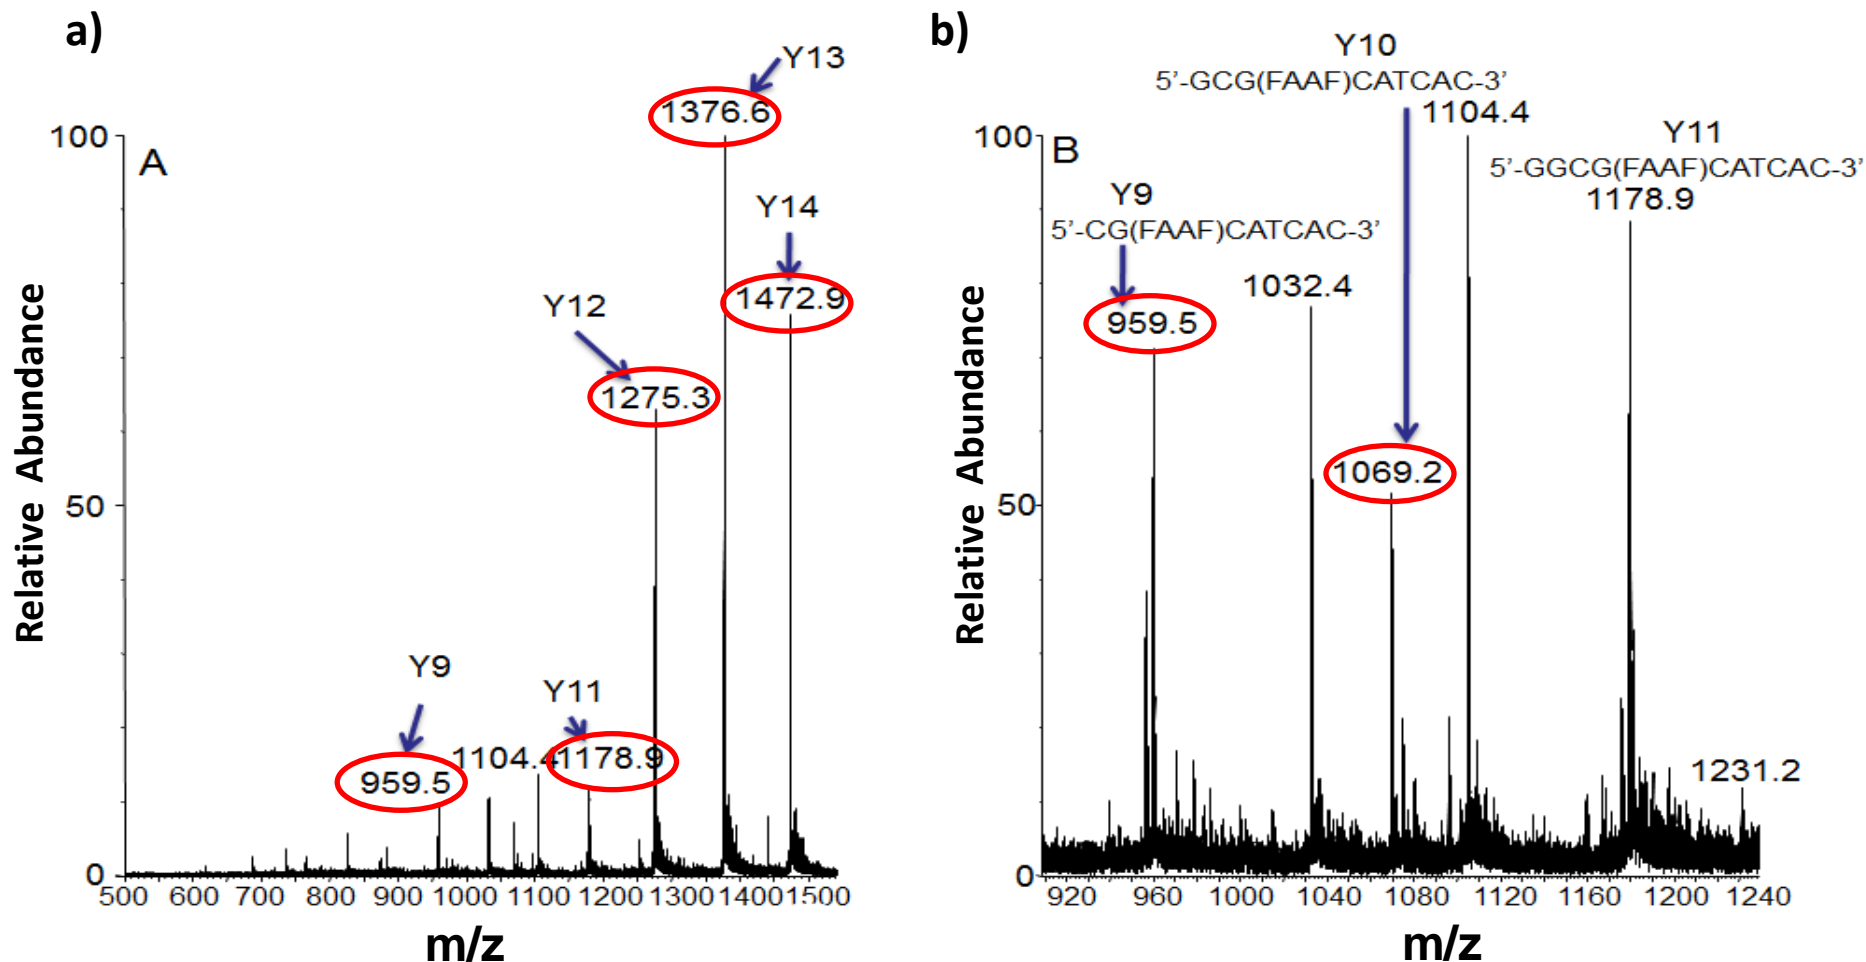

**Figure S5:** Molecular ion spectra of peak 2 after 5'-exonuclease digestion conducted on Waters SYNAPT ESI-QTOF-mass spectrometer in negative ion and V-modes (a) complete m/z range and (b) m/z range from 900-1240. The 5'-exonuclease digest products are labeled Y consistent with the accepted nomenclature first proposed by McLuckey and Habibigoudarzi (*J. Am. Chem. Soc.* **1993**, *115*, 12085–12095).

## NarI G<sub>2</sub> 3' exonuclease digestion

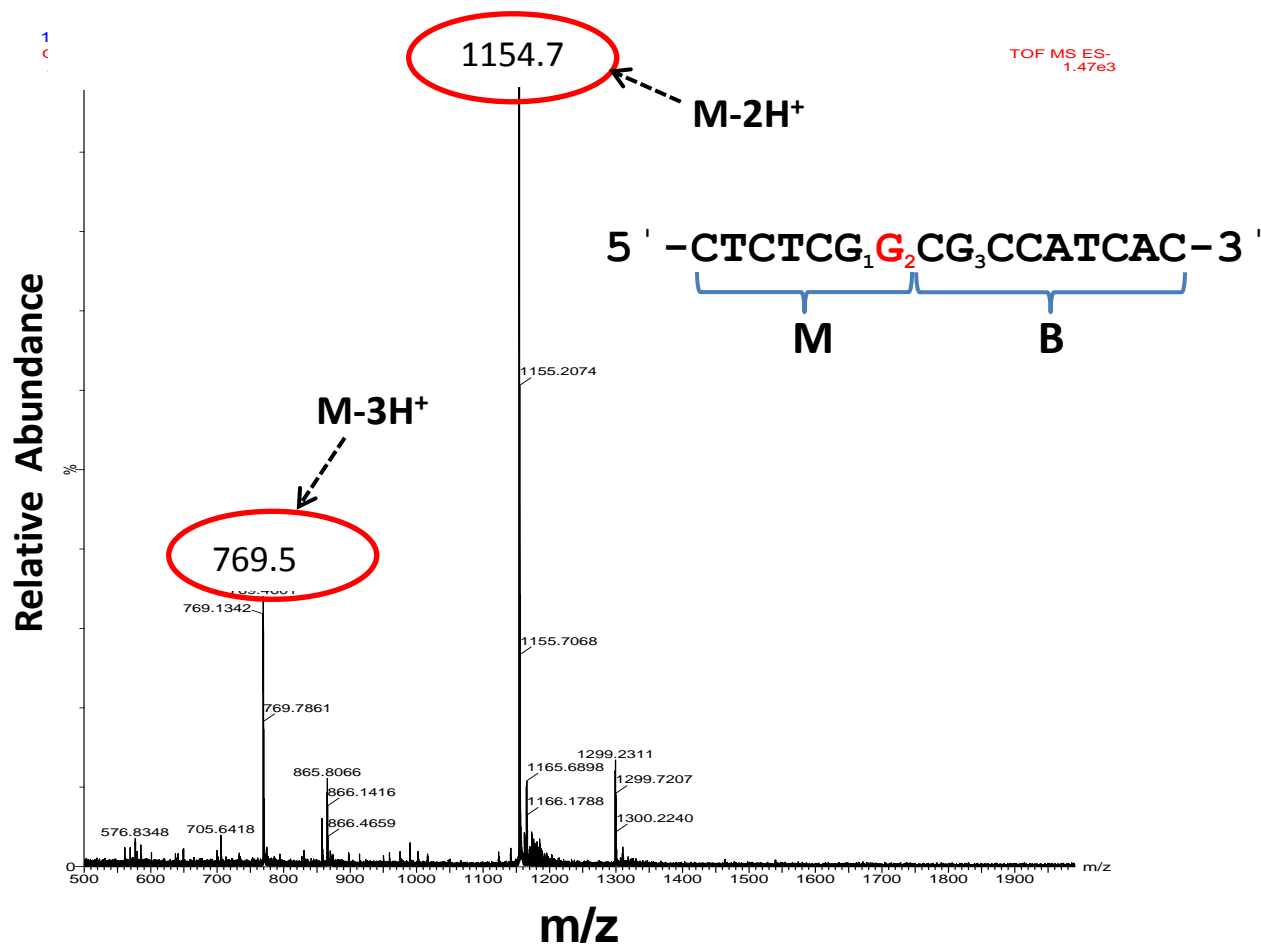

**Figure S6:** Molecular ion spectra of peak 3 after 3'-exonuclease digestion conducted on Waters SYNAPT ESI-QTOF-mass spectrometer in negative ion and V-modes.

# NarI G<sub>2</sub> 5' exonuclease digestion

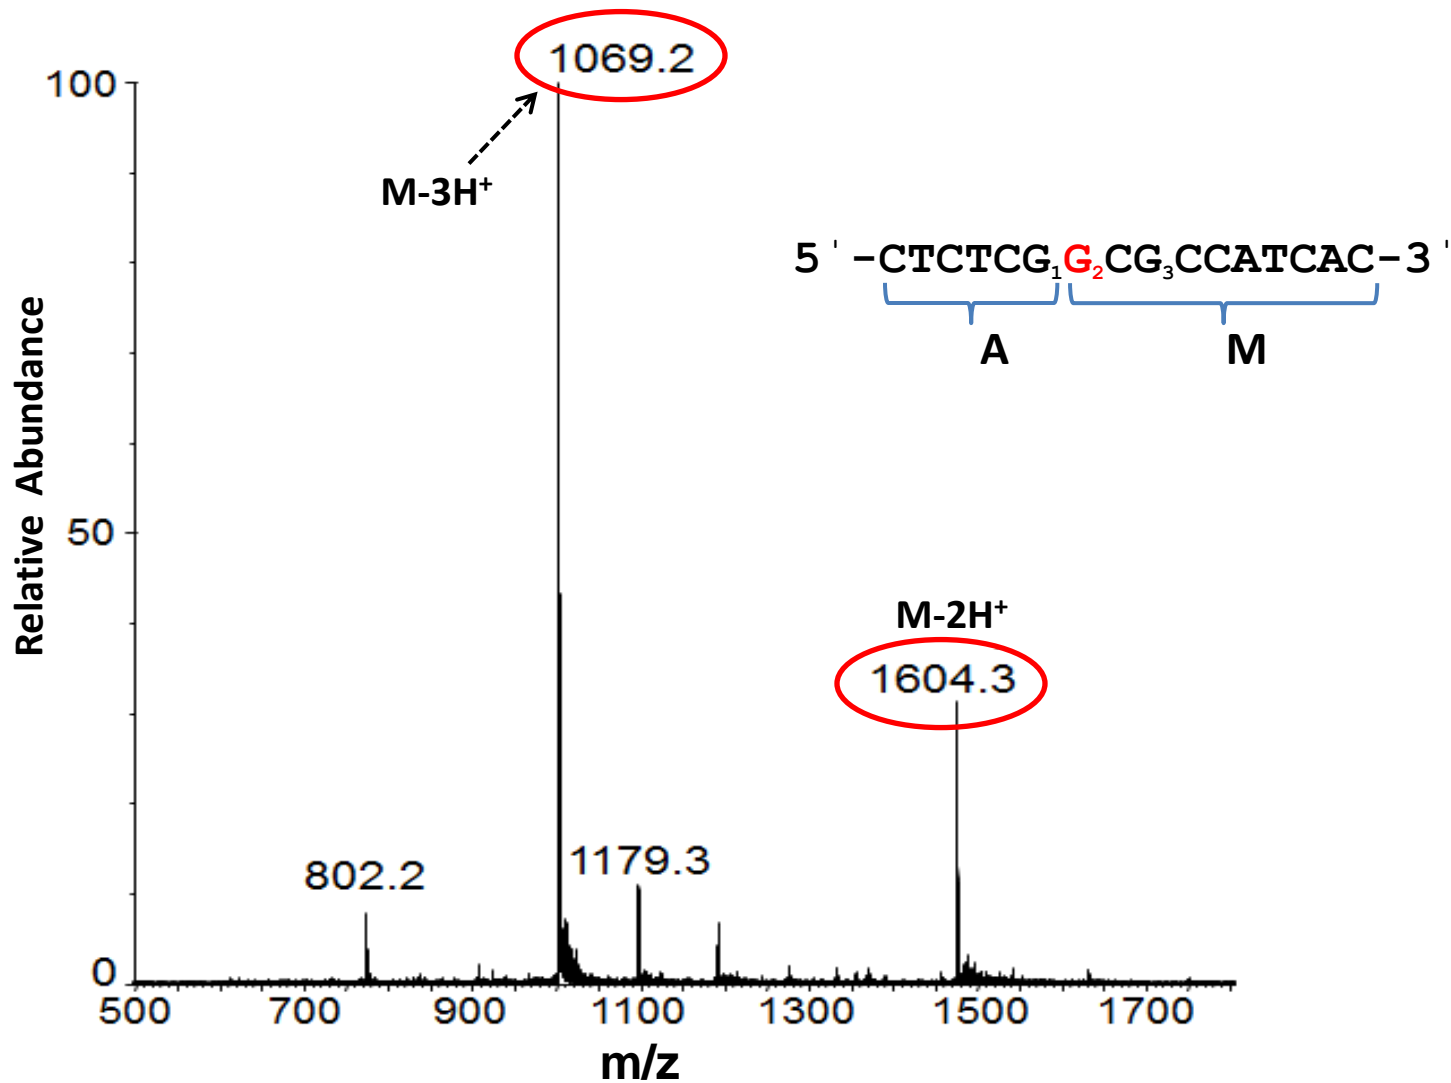

**Figure S7:** Molecular ion spectra of peak 3 after 5'-exonuclease digestion conducted on Waters SYNAPT ESI-QTOF-mass spectrometer in negative ion and V-modes.



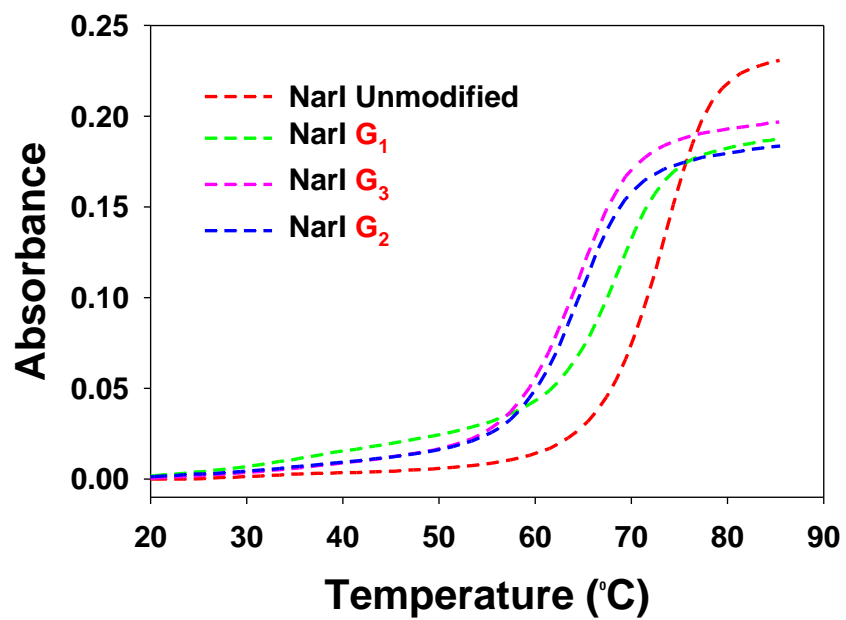

**Figure S8:** UV-melting curves of the three FAAF-*NarI* duplexes and an unmodified control duplex, all at 6.4  $\mu\text{M}$  in 0.2 M NaCl, 10 mM sodium phosphate, and 0.2 mM EDTA at pH 7 .

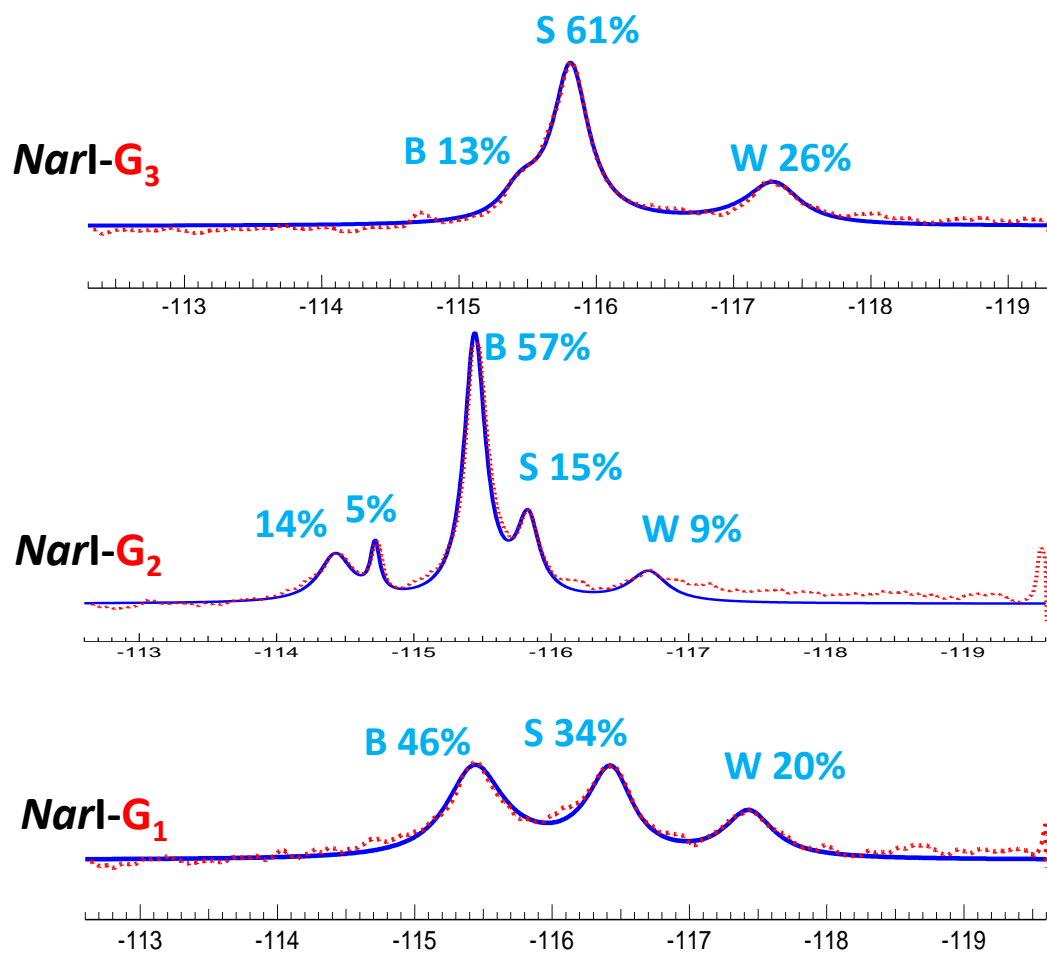

**Figure S9:** Line simulation of fully paired FAAF-modified *NarI* 16-mer (5'-CTCTCG<sub>1</sub>G<sub>2</sub>CG<sub>3</sub>CCATCAC-3') duplexes at 5 °C.

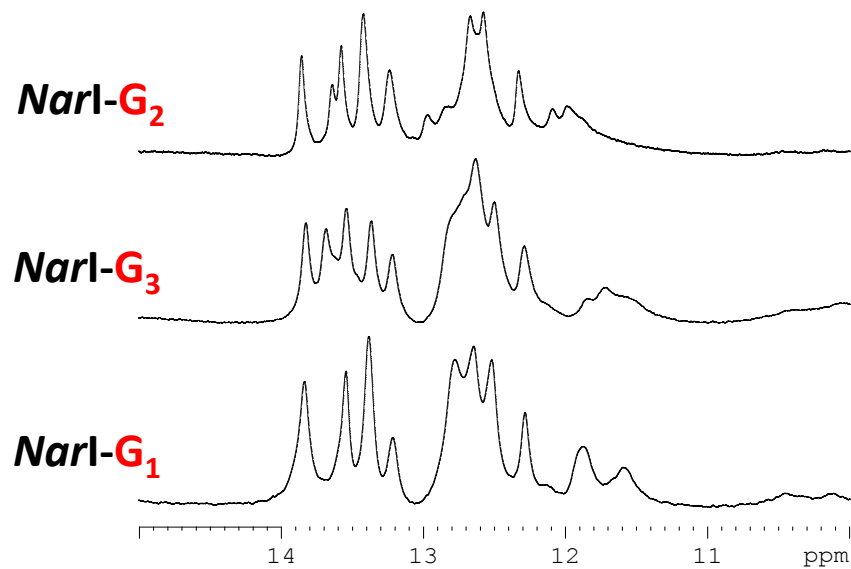

**Figure S10:** Imino proton region (10-15 ppm) of proton NMR of fully paired FAAF-modified *NarI* 16-mer duplexes at 5 °C.

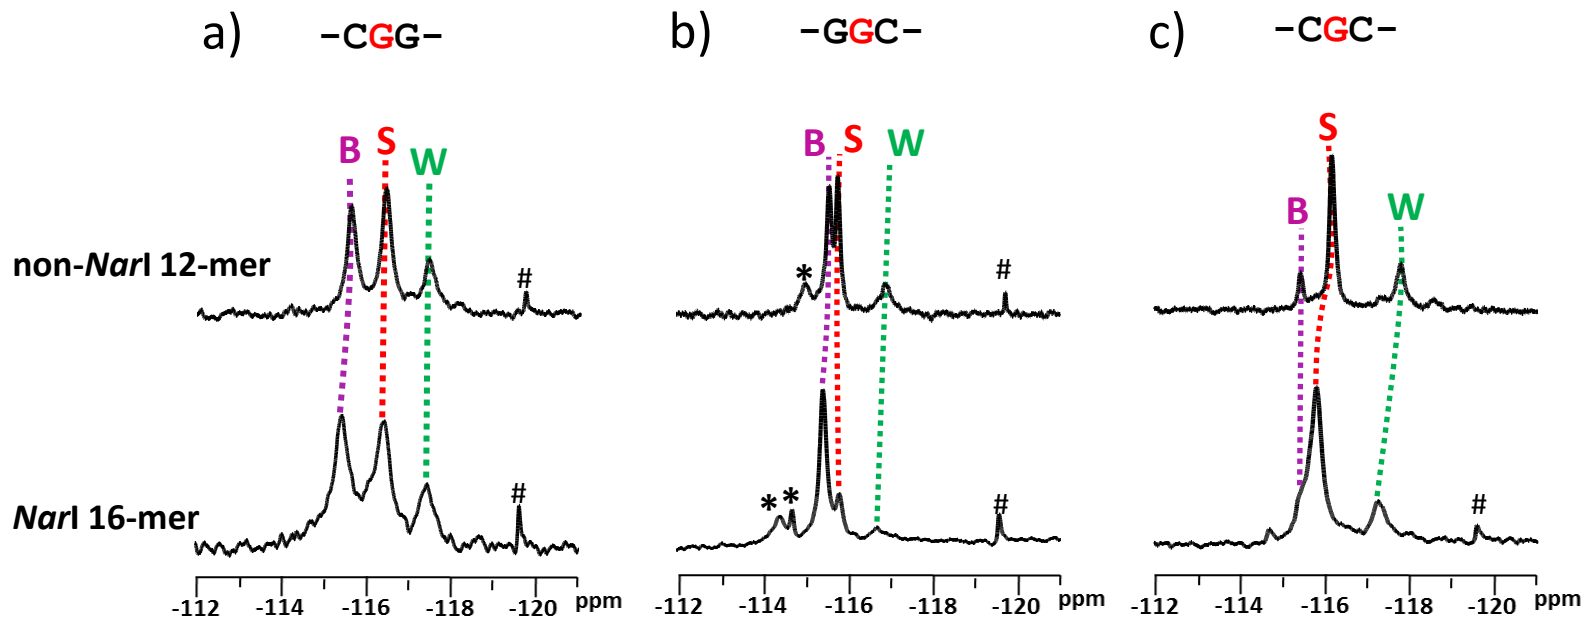

**Figure S11:**  $^{19}\text{F}$  NMR chemical shifts comparison of FAAF-modified *NarI* 16-mer and FAAF-modified non-*NarI* 12-mer duplexes. a) -CGG-, b) -GGC-, and c) -CGG- sequence context at 5 °C. \* unknown conformers; # impurity.

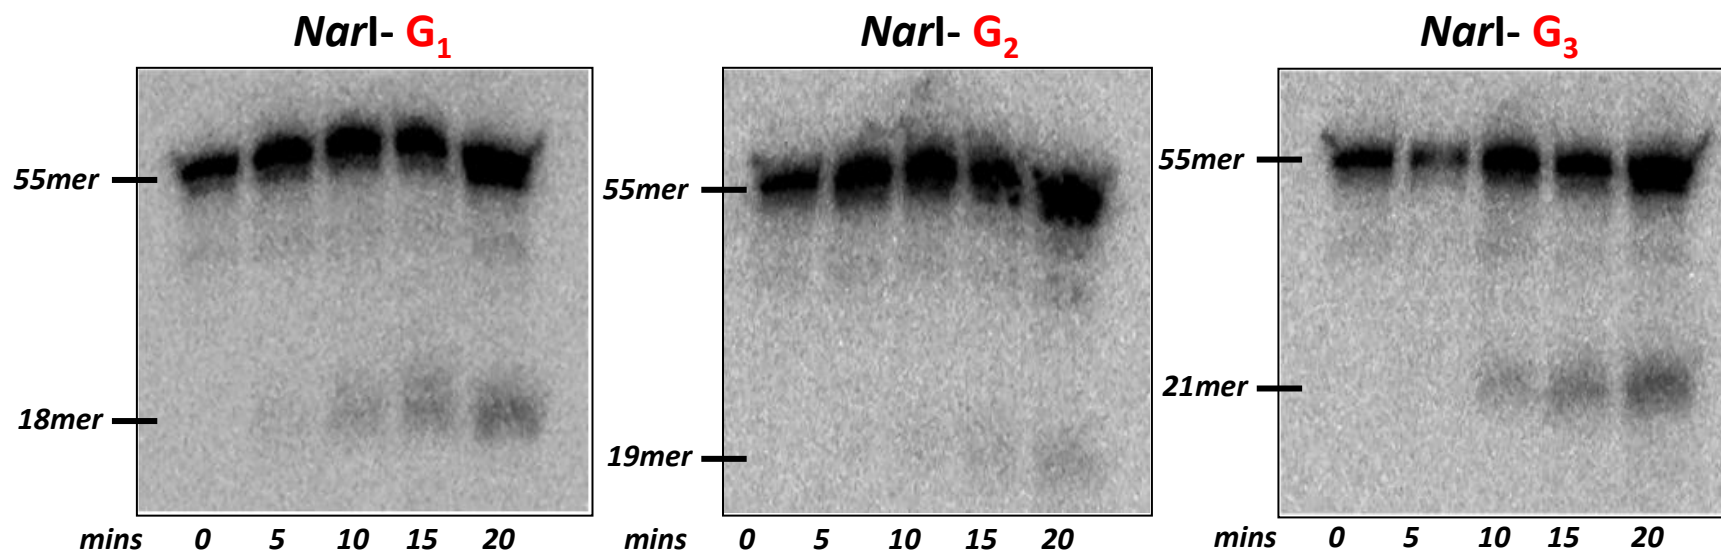

**Figure S12:** The 5'-terminally labeled DNA substrates containing the FAAF modified *NarI* sequence (2 nM) were incubated with UvrABC (UvrA, 10 nM, UvrB, 250 nM, and UvrC, 100 nM) in UvrABC reaction buffer at 37°C for the time period mentioned above. The incision products were then analyzed on a 12% polyacrylamide sequencing gel under denaturing condition. The 55-mer represents the intact DNA substrates, and the 18mer, 19mer and 21mer represent the 5'-incised DNA fragments for *NarI* G<sub>1</sub>, *NarI* G<sub>2</sub> and *NarI* G<sub>3</sub>, respectively.

**Supplementary Table S1.** Thermal and thermodynamic parameters of FAAF modified *NarI* duplexes obtained from UV-melting curves

|                                                | 5'-CTCTCG <sub>1</sub> G <sub>2</sub> CG <sub>3</sub> CCATCAC-3'<br>3'-GAGAGC C GCGGTAGAG-5' |                   |                                      |               |                                |                          |                                             |                      |
|------------------------------------------------|----------------------------------------------------------------------------------------------|-------------------|--------------------------------------|---------------|--------------------------------|--------------------------|---------------------------------------------|----------------------|
|                                                | $-\Delta H$<br>kcal/mol                                                                      | $-\Delta S$<br>eu | $-\Delta G_{37^\circ C}$<br>kcal/mol | $T_m^b$<br>°C | $\Delta\Delta H^c$<br>kcal/mol | $\Delta\Delta S^d$<br>eu | $\Delta\Delta G_{37^\circ C}^e$<br>kcal/mol | $\Delta T_m^f$<br>°C |
| Control <sup>a</sup>                           | 121.9                                                                                        | 324.7             | 21.2                                 | 70.6          | -                              | -                        | -                                           | -                    |
| <i>NarI</i> -G <sub>1</sub> -FAAF <sup>a</sup> | 117.2                                                                                        | 315.8             | 19.2                                 | 66.0          | 4.7                            | 8.9                      | 2.0                                         | -4.6                 |
| <i>NarI</i> -G <sub>2</sub> -FAAF <sup>a</sup> | 116.2                                                                                        | 317.1             | 17.9                                 | 61.9          | 5.7                            | 7.6                      | 3.3                                         | -8.7                 |
| <i>NarI</i> -G <sub>3</sub> -FAAF <sup>a</sup> | 111.9                                                                                        | 304.4             | 17.5                                 | 61.8          | 10.0                           | 20.3                     | 3.7                                         | -8.8                 |

a) The results of curve fit and  $T_m$ -lnC<sub>i</sub> dependence were within 15% of each other, and these numbers are averages of the two methods. The average standard deviations for  $-\Delta G$ ,  $-\Delta H$ , and  $T_m$  are  $\pm 0.2$ ,  $\pm 3.2$ , and  $\pm 0.4$ , respectively.

b)  $T_m$  values at 0.1mM extrapolated from these two methods.

c)  $\Delta\Delta H = \Delta H$  (modified duplex) -  $\Delta H$  (control duplex).

d)  $\Delta\Delta S = \Delta S$  (modified duplex) -  $\Delta S$  (control duplex).

e)  $\Delta\Delta G = \Delta G$  (modified duplex) -  $\Delta G$  (control duplex).

f)  $\Delta T_m = T_m$  (modified duplex) -  $T_m$  (control duplex).

**Supplementary Table S2.** Chemical shift information of different conformers exhibited by FAAF-modified *NarI* and non-*NarI* duplexes

| FAAF modified duplexes                       | <sup>19</sup> F Chemical Shifts at 5°C (ppm) |          |          |          |
|----------------------------------------------|----------------------------------------------|----------|----------|----------|
|                                              | <i>Minor conformers</i>                      | <i>B</i> | <i>S</i> | <i>W</i> |
| <i>NarI</i> -CG <sub>1</sub> G <sub>2</sub>  |                                              | -115.4   | -116.4   | -117.4   |
| <i>NarI</i> -G <sub>1</sub> G <sub>2</sub> C | -114.4, -114.7                               | -115.4   | -115.8   | -116.7   |
| <i>NarI</i> -CG <sub>3</sub> C               | -114.7                                       | -115.5   | -115.8   | -117.3   |
| non- <i>NarI</i> -CGG                        |                                              | -115.6   | -116.4   | -117.4   |
| non- <i>NarI</i> -GGC                        | -115.0                                       | -115.6   | -115.8   | -116.9   |
| non- <i>NarI</i> -CGC                        |                                              | -115.4   | -116.2   | -117.8   |
